# Supplementary material for: Type III Collagen is Required for Adipogenesis and Actin Stress Fibre Formation in 3T3-L1 Preadipocytes
Source: MDPI journal article supplement (doi:10.3390/biom11020156), 2021-01-25
Supplement: s1 [file s1]

Article

# Type III Collagen is Required for Adipogenesis and Actin Stress Fibre Formation in 3T3-L1 Preadipocytes.

Mohammad Al Hasan <sup>1</sup>, Patricia E Martin <sup>1</sup>, Xinhua Shu <sup>1,2</sup>, Steven Patterson <sup>1</sup> and Chris Bartholomew <sup>1,\*</sup>

**Citation:** Al Hasan, M.; Martin, P.E.; Shu, X.; Patterson, S.; Bartholomew, C. Type III Collagen is Required for Adipogenesis and Actin Stress Fibre Formation in 3T3-L1 Preadipocytes. *Biomolecules* **2021**, *11*, 156.

<https://doi.org/10.3390/biom11020156>

6

<sup>1</sup> Department of Biological & Biomedical Sciences, School of Health & Life Sciences, Glasgow Caledonian University, City Campus, Cowcaddens Road, Glasgow, G4 OBA, Scotland; Mohammad.al.hasan@outlook.com (M.A.H.); patricia.martin@gcu.ac.uk (P.E.M.); xinhua.shu@gcu.ac.uk (X.S.); steven.patterson@gcu.ac.uk (S.P.)

<sup>2</sup> Department of Vision Science, School of Health & Life Sciences, City Campus, Glasgow Caledonian University, Cowcaddens Road, Glasgow G4 OBA, UK

\* Correspondence: c.bartholomew@gcu.ac.uk; Tel.: +44-0141-331-3213

Academic Editor: Carole Aimé

Received: 09 December 2020

Accepted: 20 January 2021

Published: 25 January 2021

**Publisher's Note:** MDPI stays neutral with regard to jurisdictional claims in published maps and institutional affiliations.

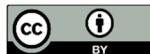

**Copyright:** © 2021 by the authors. Submitted for possible open access publication under the terms and conditions of the Creative Commons Attribution (CC BY) license (<http://creativecommons.org/licenses/by/4.0/>).

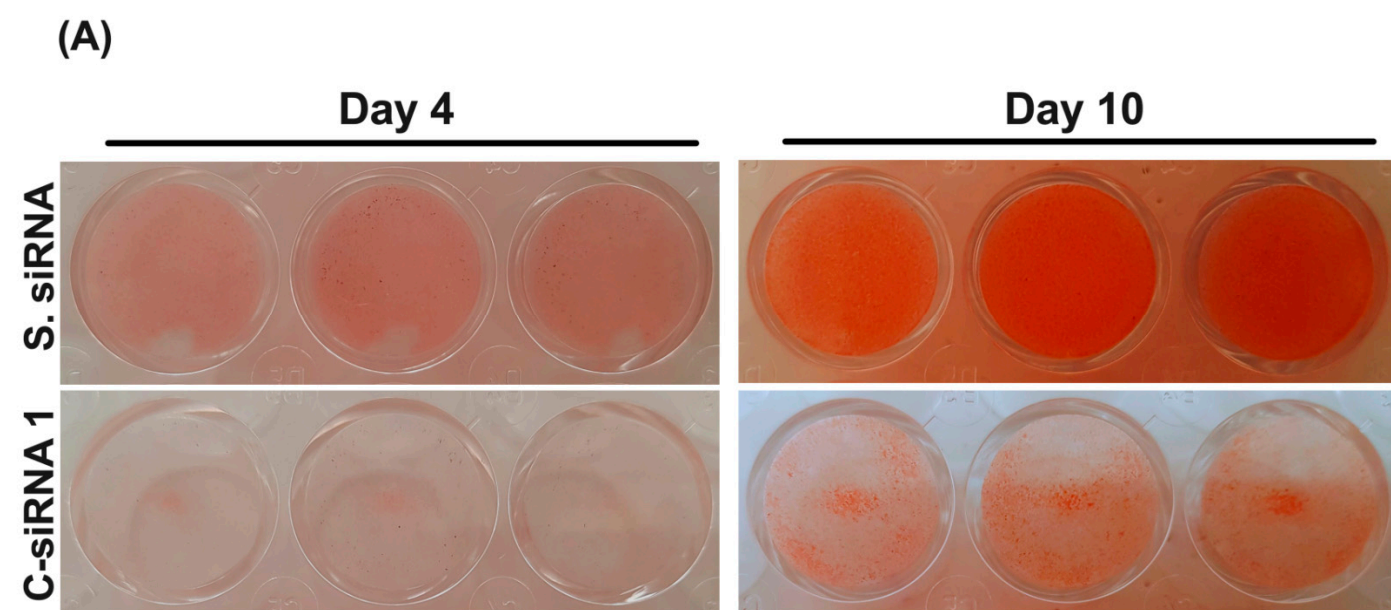

**Figure S1. A:** Image of Oil red O stained 3T3-L1 cells, independently treated with either scrambled control S. siRNA or C-siRNA1, at the indicated days of differentiation.

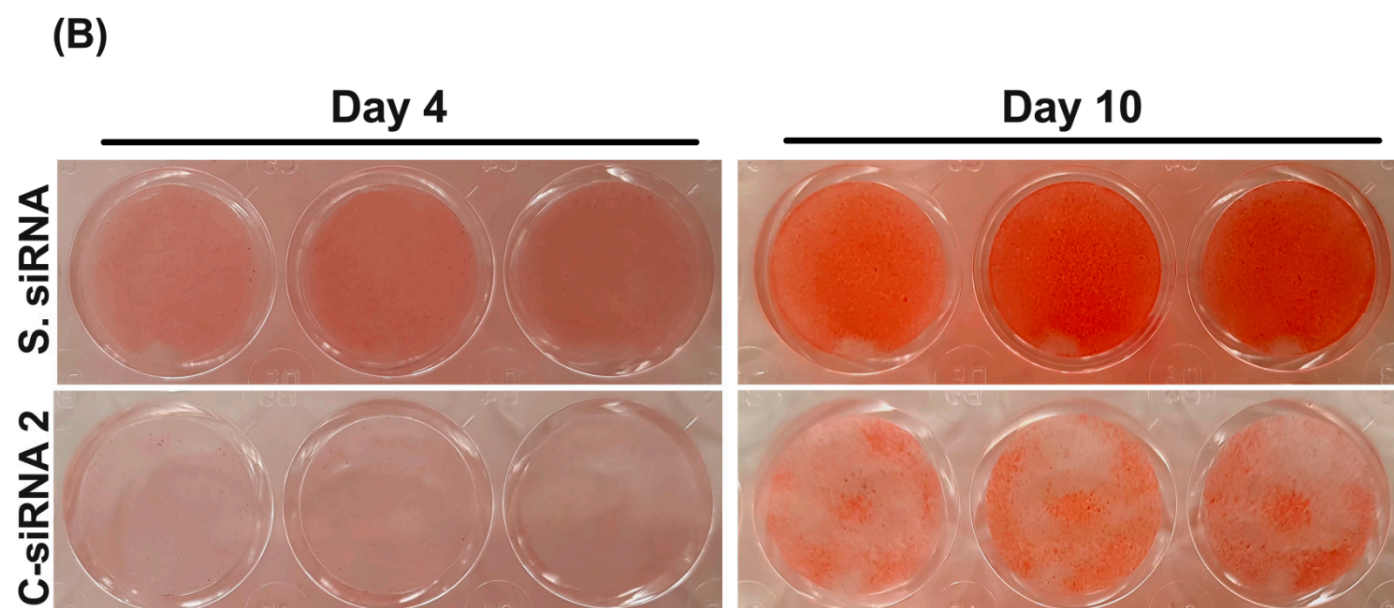

**Figure S1. B:** Image of Oil red O stained 3T3-L1 cells, independently treated with either scrambled control S. siRNA or C-siRNA2, at the indicated days of differentiation.
